# Supplementary material
Source: publisher figshare collection journal article supplement (https://karger.figshare.com/ndownloader/files/30642621)
Supplement: Supplementary file 1 [file 30642621]

*Supplementary Table* Binary logistic regression between VS+BD classification result (class I,II vs class III,IV) and outcome of mortality

|  | Significance | OR | 95% CI | |
| --- | --- | --- | --- | --- |
| Lower | Upper |
| Class I,II vs III,IV | 0.002* | 25.348 | 3.358 | 191.346 |

OR=Odds Ratio, CI=Confidence Interval

The risk for mortality increases massively in the higher shock (III,IV) compared to the less severe ones (I,II)
